# Supplementary material for: Asymmetric structural colors based on monodisperse single-crystal Cu2O spheres
Source: Royal Society of Chemistry journal article supplement (doi:10.1039/c9nr09472e), 2019-12-30
Supplement: c9nr09472e1.pdf [file c9nr09472e1.pdf]

## Supporting information

### Asymmetric Structural Colors Based on Monodisperse Single Crystal $\text{Cu}_2\text{O}$ spheres

Jiajie Bi<sup>a</sup>, Yue Wu<sup>a</sup>, Lu Li<sup>b</sup>, Shufen Zhang<sup>a</sup> and Suli Wu<sup>a\*</sup>

<sup>a</sup>State Key Laboratory of Fine Chemicals Dalian University of Technology, 2# Linggong Road, Dalian 116024, P.R. China, E-mail: [wusuli@dlut.edu.cn](mailto:wusuli@dlut.edu.cn)

<sup>b</sup>Qingdao University of Science and Technology, China

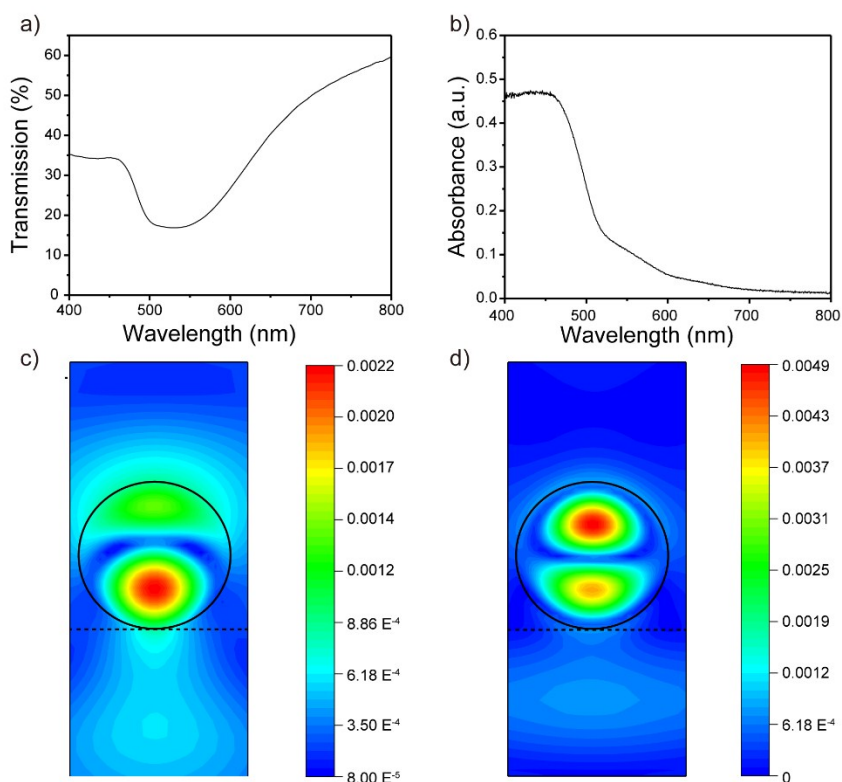

**Fig. S1** The transmission (a) and the absorption (b) spectrum of the film built from 200 nm single crystal  $\text{Cu}_2\text{O}$  spheres; the distributions of magnetic field distribution of a single crystal  $\text{Cu}_2\text{O}$  sphere on a transparent glass slide calculated by a FDTD method from front incidence at 528 nm c) and back incidence at 498 nm d).

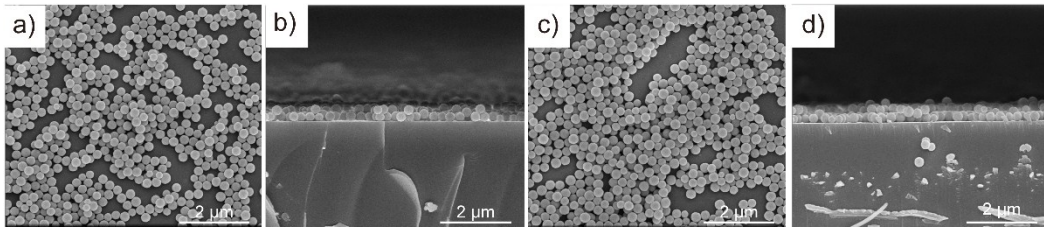

**Fig. S2** SEM images and cross section of  $\text{Cu}_2\text{O}$  spheres with different size. (a-b) 240 nm; (c-d) 270 nm.

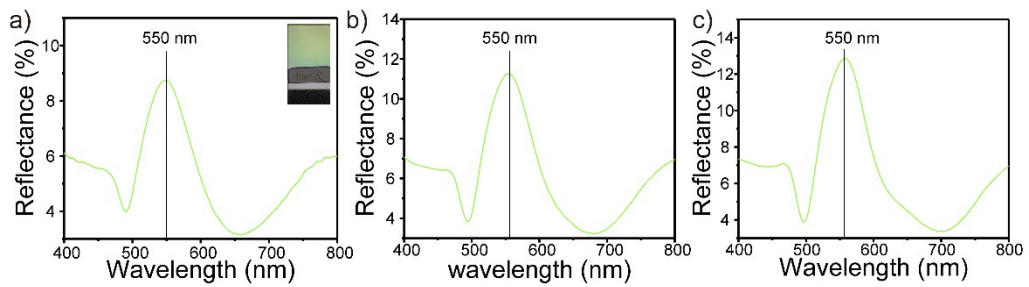

**Fig. S3** The reflectance spectra and photographs of back side of different coverage density of the films with 240 nm single crystalline  $\text{Cu}_2\text{O}$  spheres.

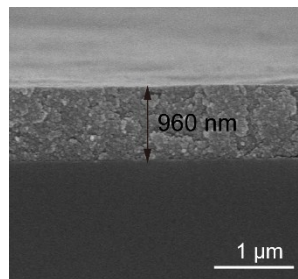

**Fig. S4** The cross section SEM of  $\text{TiO}_2$  layer.
